# Supplementary material for: Identification and Functional Annotation of Genome-Wide ER-Regulated Genes in Breast Cancer Based on ChIP-Seq Data
Source: Hindawi journal article supplement (doi:10.1155/2012/568950), 2012-01-01
Supplement: f1 [file 568950.f1.pdf]

**Additional file 1 – Differentially expressed genes in the vicinity of ER binding sites**

| RefSeq_ID | Gene Symbol | Chromosome | Expression Level |                |
|-----------|-------------|------------|------------------|----------------|
|           |             |            | Up-regulated     | Down-regulated |
| NR_028386 | LOC375196   | chr2       |                  | +              |
| NR_027322 | LOC283070   | chr10      |                  | +              |
| NR_026955 | LOC121838   | chr13      |                  | +              |
| NR_026943 | LOC642852   | chr21      |                  | +              |
| NR_026800 | KIAA0125    | chr14      |                  | +              |
| NR_026773 | C6orf123    | chr6       |                  | +              |
| NR_024576 | SEC61A2     | chr10      |                  | +              |
| NM_199005 | ZNF322B     | chr9       |                  | +              |
| NM_197956 | NAIF1       | chr9       |                  | +              |
| NM_183419 | RNF19A      | chr8       |                  | +              |
| NM_182757 | RNF144B     | chr6       |                  | +              |
| NM_181709 | FAM101A     | chr12      |                  | +              |
| NM_181671 | PITPNC1     | chr17      |                  | +              |
| NM_181354 | OXR1        | chr8       |                  | +              |
| NM_181054 | HIF1A       | chr14      |                  | +              |
| NM_178815 | ARL5B       | chr10      |                  | +              |
| NM_173515 | CNKS3       | chr6       |                  | +              |
| NM_173354 | SIK1        | chr21      |                  | +              |
| NM_153229 | TMEM92      | chr17      |                  | +              |
| NM_152903 | KBTBD6      | chr13      |                  | +              |
| NM_152830 | ACE         | chr17      |                  | +              |
| NM_152365 | C1orf172    | chr1       |                  | +              |
| NM_152308 | C16orf75    | chr16      |                  | +              |
| NM_152295 | TARS        | chr5       |                  | +              |
| NM_152243 | CDC42EP1    | chr22      |                  | +              |
| NM_147184 | TP53I3      | chr2       |                  | +              |
| NM_145804 | ABTB2       | chr11      |                  | +              |
| NM_144665 | SESN3       | chr11      |                  | +              |
| NM_139283 | PPTC7       | chr12      |                  | +              |
| NM_138572 | TAF8        | chr6       |                  | +              |
| NM_133510 | RAD51L1     | chr14      |                  | +              |
| NM_130445 | COL18A1     | chr21      |                  | +              |
| NM_080927 | DCBLD2      | chr3       |                  | +              |
| NM_053031 | MYLK        | chr3       |                  | +              |
| NM_052929 | FHAD1       | chr1       |                  | +              |
| NM_052870 | SNX18       | chr5       |                  | +              |
| NM_052864 | TIFA        | chr4       |                  | +              |
| NM_033508 | GCK         | chr7       |                  | +              |
| NM_033379 | CDC2        | chr10      |                  | +              |

|           |          |       |  |   |
|-----------|----------|-------|--|---|
| NM_033069 | C6orf114 | chr6  |  | + |
| NM_033023 | PDGFA    | chr7  |  | + |
| NM_032873 | UBASH3B  | chr11 |  | + |
| NM_032717 | AGPAT9   | chr4  |  | + |
| NM_032211 | LOXL4    | chr10 |  | + |
| NM_032148 | SLC41A2  | chr12 |  | + |
| NM_032048 | EMILIN2  | chr18 |  | + |
| NM_031965 | GSG2     | chr17 |  | + |
| NM_031892 | SH3KBP1  | chrX  |  | + |
| NM_030797 | FAM49A   | chr2  |  | + |
| NM_024605 | ARHGAP10 | chr4  |  | + |
| NM_024587 | TMEM53   | chr1  |  | + |
| NM_024524 | ATP13A3  | chr3  |  | + |
| NM_024076 | KCTD15   | chr19 |  | + |
| NM_024070 | PVRIG    | chr7  |  | + |
| NM_021177 | LSM2     | chr6  |  | + |
| NM_020947 | KIAA1609 | chr16 |  | + |
| NM_020845 | PITPNM2  | chr12 |  | + |
| NM_020805 | KLHL14   | chr18 |  | + |
| NM_020803 | KLHL8    | chr4  |  | + |
| NM_020458 | TTC7A    | chr2  |  | + |
| NM_020397 | CAMK1D   | chr10 |  | + |
| NM_020382 | SETD8    | chr12 |  | + |
| NM_020225 | STOX2    | chr4  |  | + |
| NM_018990 | SASH3    | chrX  |  | + |
| NM_018697 | LANCL2   | chr7  |  | + |
| NM_018649 | H2AFY2   | chr10 |  | + |
| NM_018641 | CHST12   | chr7  |  | + |
| NM_018482 | ASAP1    | chr8  |  | + |
| NM_018265 | C1orf106 | chr1  |  | + |
| NM_018112 | TMEM38B  | chr9  |  | + |
| NM_018006 | TRMU     | chr22 |  | + |
| NM_017791 | FLVCR2   | chr14 |  | + |
| NM_017784 | OSBPL10  | chr3  |  | + |
| NM_017628 | TET2     | chr4  |  | + |
| NM_017596 | KIF21B   | chr1  |  | + |
| NM_017551 | GRID1    | chr10 |  | + |
| NM_017519 | ARID1B   | chr6  |  | + |
| NM_017490 | MARK2    | chr11 |  | + |
| NM_017436 | A4GALT   | chr22 |  | + |
| NM_016448 | DTL      | chr1  |  | + |
| NM_016445 | PLEK2    | chr14 |  | + |
| NM_016282 | AK3      | chr9  |  | + |

|           |           |       |  |   |
|-----------|-----------|-------|--|---|
| NM_016071 | MRPS33    | chr7  |  | + |
| NM_016058 | TPRKB     | chr2  |  | + |
| NM_015991 | C1QA      | chr1  |  | + |
| NM_015379 | BRI3      | chr7  |  | + |
| NM_015259 | ICOSLG    | chr21 |  | + |
| NM_015215 | CAMTA1    | chr1  |  | + |
| NM_015112 | MAST2     | chr1  |  | + |
| NM_015093 | MAP3K7IP2 | chr6  |  | + |
| NM_015029 | POP1      | chr8  |  | + |
| NM_015018 | DOPEY1    | chr6  |  | + |
| NM_014732 | KIAA0513  | chr16 |  | + |
| NM_014696 | GPRIN2    | chr10 |  | + |
| NM_014553 | TFCP2L1   | chr2  |  | + |
| NM_014363 | SACS      | chr13 |  | + |
| NM_014214 | IMPA2     | chr18 |  | + |
| NM_014176 | UBE2T     | chr1  |  | + |
| NM_013336 | SEC61A1   | chr3  |  | + |
| NM_012293 | PXDN      | chr2  |  | + |
| NM_012259 | HEY2      | chr6  |  | + |
| NM_012100 | DNPEP     | chr2  |  | + |
| NM_012083 | FRAT2     | chr10 |  | + |
| NM_007355 | HSP90AB1  | chr6  |  | + |
| NM_007107 | SSR3      | chr3  |  | + |
| NM_007080 | LSM6      | chr4  |  | + |
| NM_007024 | TMEM115   | chr3  |  | + |
| NM_006941 | SOX10     | chr22 |  | + |
| NM_006808 | SEC61B    | chr9  |  | + |
| NM_006795 | EHD1      | chr11 |  | + |
| NM_006607 | PTTG2     | chr4  |  | + |
| NM_006482 | DYRK2     | chr12 |  | + |
| NM_006203 | PDE4D     | chr5  |  | + |
| NM_006080 | SEMA3A    | chr7  |  | + |
| NM_005792 | MPHOSPH6  | chr16 |  | + |
| NM_005729 | PPIF      | chr10 |  | + |
| NM_005720 | ARPC1B    | chr7  |  | + |
| NM_005596 | NFIB      | chr9  |  | + |
| NM_005582 | CD180     | chr5  |  | + |
| NM_005434 | MALL      | chr2  |  | + |
| NM_005402 | RALA      | chr7  |  | + |
| NM_005360 | MAF       | chr16 |  | + |
| NM_005297 | MCHR1     | chr22 |  | + |
| NM_005253 | FOSL2     | chr2  |  | + |
| NM_004972 | JAK2      | chr9  |  | + |

|              |         |       |  |   |
|--------------|---------|-------|--|---|
| NM_004952    | EFNA3   | chr1  |  | + |
| NM_004930    | CAPZB   | chr1  |  | + |
| NM_004924    | ACTN4   | chr19 |  | + |
| NM_004782    | SNAP29  | chr22 |  | + |
| NM_004745    | DLGAP2  | chr8  |  | + |
| NM_004690    | LATS1   | chr6  |  | + |
| NM_004669    | CLIC3   | chr9  |  | + |
| NM_004595    | SMS     | chrX  |  | + |
| NM_004586    | RPS6KA3 | chrX  |  | + |
| NM_004578    | RAB4A   | chr1  |  | + |
| NM_004394    | DAP     | chr5  |  | + |
| NM_004387    | NKX2-5  | chr5  |  | + |
| NM_004215    | EBAG9   | chr8  |  | + |
| NM_003954    | MAP3K14 | chr17 |  | + |
| NM_003935    | TOP3B   | chr22 |  | + |
| NM_003770    | KRT37   | chr17 |  | + |
| NM_003745    | SOCS1   | chr16 |  | + |
| NM_003576    | STK24   | chr13 |  | + |
| NM_003488    | AKAP1   | chr17 |  | + |
| NM_003374    | VDAC1   | chr5  |  | + |
| NM_003222    | TFAP2C  | chr20 |  | + |
| NM_002980    | SCTR    | chr2  |  | + |
| NM_002568    | PABPC1  | chr8  |  | + |
| NM_002547    | OPHN1   | chrX  |  | + |
| NM_002485    | NBN     | chr8  |  | + |
| NM_002467    | MYC     | chr8  |  | + |
| NM_002271    | IPO5    | chr13 |  | + |
| NM_002163    | IRF8    | chr16 |  | + |
| NM_002144    | HOXB1   | chr17 |  | + |
| NM_002061    | GCLM    | chr1  |  | + |
| NM_002046    | GAPDH   | chr12 |  | + |
| NM_001987    | ETV6    | chr12 |  | + |
| NM_001962    | EFNA5   | chr5  |  | + |
| NM_001935    | DPP4    | chr2  |  | + |
| NM_001905    | CTPS    | chr1  |  | + |
| NM_001874    | CPM     | chr12 |  | + |
| NM_001838    | CCR7    | chr17 |  | + |
| NM_001453    | FOXC1   | chr6  |  | + |
| NM_001427    | EN2     | chr7  |  | + |
| NM_001163817 | DHCR7   | chr11 |  | + |
| NM_001161442 | SH2D2A  | chr1  |  | + |
| NM_001161440 | PTPRH   | chr19 |  | + |
| NM_001144033 | STOML3  | chr13 |  | + |

|              |           |       |   |   |
|--------------|-----------|-------|---|---|
| NM_001142864 | FAM38A    | chr16 |   | + |
| NM_001142776 | CHAC1     | chr15 |   | + |
| NM_001135242 | NDRG1     | chr8  |   | + |
| NM_001134479 | LRRC8D    | chr1  |   | + |
| NM_001130716 | PLAC8     | chr4  |   | + |
| NM_001130455 | DYSF      | chr2  |   | + |
| NM_001130141 | PCBP3     | chr21 |   | + |
| NM_001126121 | SLC25A19  | chr17 |   | + |
| NM_001102    | ACTN1     | chr14 |   | + |
| NM_001099856 | IKBKG     | chrX  |   | + |
| NM_001099786 | ICAM2     | chr17 |   | + |
| NM_001099285 | PTMA      | chr2  |   | + |
| NM_001098815 | KIAA0748  | chr12 |   | + |
| NM_001098270 | MGAT3     | chr22 |   | + |
| NM_001082959 | SCARB1    | chr12 |   | + |
| NM_001040446 | MTMR12    | chr5  |   | + |
| NM_001013436 | MPST      | chr22 |   | + |
| NM_001005389 | NFASC     | chr1  |   | + |
| NM_001005190 | OR7A10    | chr19 |   | + |
| NM_001004416 | UMODL1    | chr21 |   | + |
| NM_001003395 | TPD52L1   | chr6  |   | + |
| NM_001001740 | RFWD2     | chr1  |   | + |
| NM_001001392 | CD44      | chr11 |   | + |
| NM_000977    | RPL13     | chr16 |   | + |
| NM_000944    | PPP3CA    | chr4  |   | + |
| NM_000701    | ATP1A1    | chr1  |   | + |
| NM_000700    | ANXA1     | chr9  |   | + |
| NM_000573    | CR1       | chr1  |   | + |
| NM_000274    | OAT       | chr10 |   | + |
| NM_000189    | HK2       | chr2  |   | + |
| NR_030691    | ANO1      | chr11 | + |   |
| NR_028408    | LOC400027 | chr12 | + |   |
| NR_028048    | CRAT      | chr9  | + |   |
| NR_027868    | PDCD6IP   | chr3  | + |   |
| NR_026779    | C14orf139 | chr14 | + |   |
| NR_026590    | CDYL      | chr6  | + |   |
| NR_024555    | RHOBTB1   | chr10 | + |   |
| NR_003587    | MYO15B    | chr17 | + |   |
| NR_003367    | PVT1      | chr8  | + |   |
| NM_213613    | SLC26A1   | chr4  | + |   |
| NM_213601    | TMED8     | chr14 | + |   |
| NM_207446    | FAM174B   | chr15 | + |   |
| NM_206967    | C16orf74  | chr16 | + |   |

|           |          |       |   |  |
|-----------|----------|-------|---|--|
| NM_203458 | NOTCH2NL | chr1  | + |  |
| NM_203284 | RBPJ     | chr4  | + |  |
| NM_201557 | FHL2     | chr2  | + |  |
| NM_198514 | NHLRC2   | chr10 | + |  |
| NM_198461 | LONRF2   | chr2  | + |  |
| NM_194278 | C14orf43 | chr14 | + |  |
| NM_183357 | ADCY5    | chr3  | + |  |
| NM_182920 | ADAMTS9  | chr3  | + |  |
| NM_181784 | SPRED2   | chr2  | + |  |
| NM_181481 | C18orf1  | chr18 | + |  |
| NM_178126 | FAM134C  | chr17 | + |  |
| NM_177964 | LYPD6B   | chr2  | + |  |
| NM_175931 | CBFA2T3  | chr16 | + |  |
| NM_175058 | PLEKHA7  | chr11 | + |  |
| NM_174886 | TGIF1    | chr18 | + |  |
| NM_173527 | REM2     | chr14 | + |  |
| NM_173505 | ANKRD29  | chr18 | + |  |
| NM_170721 | MSI2     | chr17 | + |  |
| NM_153812 | PHF13    | chr1  | + |  |
| NM_153322 | PMP22    | chr17 | + |  |
| NM_152900 | MAGI3    | chr1  | + |  |
| NM_152793 | C7orf41  | chr7  | + |  |
| NM_152573 | RASEF    | chr9  | + |  |
| NM_152400 | C4orf32  | chr4  | + |  |
| NM_152396 | METTL6   | chr3  | + |  |
| NM_152263 | TPM3     | chr1  | + |  |
| NM_152231 | FBXO34   | chr14 | + |  |
| NM_145253 | FAM100A  | chr16 | + |  |
| NM_144973 | DENND5B  | chr12 | + |  |
| NM_144628 | TBC1D20  | chr20 | + |  |
| NM_138634 | MSMB     | chr10 | + |  |
| NM_138473 | SP1      | chr12 | + |  |
| NM_133373 | PLCD3    | chr17 | + |  |
| NM_080391 | PTP4A2   | chr1  | + |  |
| NM_053056 | CCND1    | chr11 | + |  |
| NM_033127 | SEC16B   | chr1  | + |  |
| NM_032199 | ARID5B   | chr10 | + |  |
| NM_032104 | PPP1R12B | chr1  | + |  |
| NM_030793 | FBXO38   | chr5  | + |  |
| NM_030762 | BHLHE41  | chr12 | + |  |
| NM_025268 | TMEM121  | chr14 | + |  |
| NM_025191 | EDEM3    | chr1  | + |  |
| NM_025134 | CHD9     | chr16 | + |  |

|           |          |       |   |  |
|-----------|----------|-------|---|--|
| NM_024979 | MCF2L    | chr13 | + |  |
| NM_024815 | NUDT18   | chr8  | + |  |
| NM_024607 | PPP1R3B  | chr8  | + |  |
| NM_024336 | IRX3     | chr16 | + |  |
| NM_024071 | ZFYVE21  | chr14 | + |  |
| NM_023037 | FRY      | chr13 | + |  |
| NM_022748 | TNS3     | chr7  | + |  |
| NM_022648 | TNS1     | chr2  | + |  |
| NM_022467 | CHST8    | chr19 | + |  |
| NM_022358 | KCNK15   | chr20 | + |  |
| NM_022151 | MOAP1    | chr14 | + |  |
| NM_022132 | MCCC2    | chr5  | + |  |
| NM_022068 | FAM38B   | chr18 | + |  |
| NM_021800 | DNAJC12  | chr10 | + |  |
| NM_021215 | RPRD1B   | chr20 | + |  |
| NM_021183 | RAP2C    | chrX  | + |  |
| NM_021168 | RAB40C   | chr16 | + |  |
| NM_020859 | SHROOM3  | chr4  | + |  |
| NM_020820 | PREX1    | chr20 | + |  |
| NM_020775 | KIAA1324 | chr1  | + |  |
| NM_020689 | SLC24A3  | chr20 | + |  |
| NM_020531 | C20orf3  | chr20 | + |  |
| NM_020440 | PTGFRN   | chr1  | + |  |
| NM_020424 | LYRM1    | chr16 | + |  |
| NM_020244 | CHPT1    | chr12 | + |  |
| NM_020205 | OTUD7B   | chr1  | + |  |
| NM_020190 | OLFML3   | chr1  | + |  |
| NM_020145 | SH3GLB2  | chr9  | + |  |
| NM_019020 | TBC1D16  | chr17 | + |  |
| NM_018976 | SLC38A2  | chr12 | + |  |
| NM_018344 | SLC29A3  | chr10 | + |  |
| NM_018271 | THNSL2   | chr2  | + |  |
| NM_017782 | C10orf18 | chr10 | + |  |
| NM_017771 | PXK      | chr3  | + |  |
| NM_017770 | ELOVL2   | chr6  | + |  |
| NM_017583 | TRIM44   | chr11 | + |  |
| NM_017423 | GALNT7   | chr4  | + |  |
| NM_016463 | CXXC5    | chr5  | + |  |
| NM_016441 | CRIM1    | chr2  | + |  |
| NM_016346 | NR2E3    | chr15 | + |  |
| NM_016121 | KCTD3    | chr1  | + |  |
| NM_016048 | ISOC1    | chr5  | + |  |
| NM_015886 | PI15     | chr8  | + |  |

|           |           |       |   |  |
|-----------|-----------|-------|---|--|
| NM_015635 | GAPVD1    | chr9  | + |  |
| NM_015608 | C10orf137 | chr10 | + |  |
| NM_015595 | SGEF      | chr3  | + |  |
| NM_015559 | SETBP1    | chr18 | + |  |
| NM_015525 | IBTK      | chr6  | + |  |
| NM_015522 | DYNC2LI1  | chr2  | + |  |
| NM_015404 | DFNB31    | chr9  | + |  |
| NM_015335 | MED13L    | chr12 | + |  |
| NM_015317 | PUM2      | chr2  | + |  |
| NM_015221 | DNMBP     | chr10 | + |  |
| NM_015168 | ZC3H4     | chr19 | + |  |
| NM_015130 | TBC1D9    | chr4  | + |  |
| NM_015111 | N4BP3     | chr5  | + |  |
| NM_014992 | DAAM1     | chr14 | + |  |
| NM_014945 | ABLIM3    | chr5  | + |  |
| NM_014899 | RHOBTB3   | chr5  | + |  |
| NM_014873 | LPGAT1    | chr1  | + |  |
| NM_014779 | TSC22D2   | chr3  | + |  |
| NM_014668 | GREB1     | chr2  | + |  |
| NM_014633 | CTR9      | chr11 | + |  |
| NM_014583 | LMCD1     | chr3  | + |  |
| NM_014488 | RAB30     | chr11 | + |  |
| NM_014365 | HSPB8     | chr12 | + |  |
| NM_014267 | C11orf58  | chr11 | + |  |
| NM_014246 | CELSR1    | chr22 | + |  |
| NM_013262 | MYLIP     | chr6  | + |  |
| NM_013240 | N6AMT1    | chr21 | + |  |
| NM_012398 | PIP5K1C   | chr19 | + |  |
| NM_012330 | MYST4     | chr10 | + |  |
| NM_012318 | LETM1     | chr4  | + |  |
| NM_012279 | ZNF346    | chr5  | + |  |
| NM_007218 | RNF139    | chr8  | + |  |
| NM_007173 | PRSS23    | chr11 | + |  |
| NM_007106 | UBL3      | chr13 | + |  |
| NM_007011 | ABHD2     | chr15 | + |  |
| NM_007008 | RTN4      | chr2  | + |  |
| NM_006885 | ZFH3      | chr16 | + |  |
| NM_006868 | RAB31     | chr18 | + |  |
| NM_006788 | RALBP1    | chr18 | + |  |
| NM_006710 | COPS8     | chr2  | + |  |
| NM_006645 | STARD10   | chr11 | + |  |
| NM_006633 | IQGAP2    | chr5  | + |  |
| NM_006621 | AHCYL1    | chr1  | + |  |



|           |         |       |   |  |
|-----------|---------|-------|---|--|
| NM_006556 | PMVK    | chr1  | + |  |
| NM_006513 | SARS    | chr1  | + |  |
| NM_006379 | SEMA3C  | chr7  | + |  |
| NM_006327 | TIMM23  | chr10 | + |  |
| NM_006148 | LASP1   | chr17 | + |  |
| NM_006108 | SPON1   | chr11 | + |  |
| NM_006094 | DLC1    | chr8  | + |  |
| NM_006019 | TCIRG1  | chr11 | + |  |
| NM_006009 | TUBA1A  | chr12 | + |  |
| NM_005794 | DHRS2   | chr14 | + |  |
| NM_005781 | TNK2    | chr3  | + |  |
| NM_005749 | TOB1    | chr17 | + |  |
| NM_005742 | PDIA6   | chr2  | + |  |
| NM_005723 | TSPAN5  | chr4  | + |  |
| NM_005578 | LPP     | chr3  | + |  |
| NM_005392 | PHF2    | chr9  | + |  |
| NM_005375 | MYB     | chr6  | + |  |
| NM_005252 | FOS     | chr14 | + |  |
| NM_005128 | DOPEY2  | chr21 | + |  |
| NM_005050 | ABCD4   | chr14 | + |  |
| NM_004926 | ZFP36L1 | chr14 | + |  |
| NM_004747 | DLG5    | chr10 | + |  |
| NM_004725 | BUB3    | chr10 | + |  |
| NM_004531 | MOCS2   | chr5  | + |  |
| NM_004491 | GRLF1   | chr19 | + |  |
| NM_004465 | FGF10   | chr5  | + |  |
| NM_004430 | EGR3    | chr8  | + |  |
| NM_004310 | RHOH    | chr4  | + |  |
| NM_004281 | BAG3    | chr10 | + |  |
| NM_004235 | KLF4    | chr9  | + |  |
| NM_004171 | SLC1A2  | chr11 | + |  |
| NM_004104 | FASN    | chr17 | + |  |
| NM_004078 | CSRP1   | chr1  | + |  |
| NM_004041 | ARRB1   | chr11 | + |  |
| NM_004040 | RHOB    | chr2  | + |  |
| NM_003898 | SYNJ2   | chr6  | + |  |
| NM_003848 | SUCLG2  | chr3  | + |  |
| NM_003714 | STC2    | chr5  | + |  |
| NM_003613 | CILP    | chr15 | + |  |
| NM_003568 | ANXA9   | chr1  | + |  |
| NM_003565 | ULK1    | chr12 | + |  |
| NM_003489 | NRIP1   | chr21 | + |  |
| NM_003474 | ADAM12  | chr10 | + |  |

|              |          |       |   |  |
|--------------|----------|-------|---|--|
| NM_003463    | PTP4A1   | chr6  | + |  |
| NM_003439    | ZKSCAN1  | chr7  | + |  |
| NM_003358    | UGCG     | chr9  | + |  |
| NM_003300    | TRAF3    | chr14 | + |  |
| NM_003246    | THBS1    | chr15 | + |  |
| NM_003226    | TFF3     | chr21 | + |  |
| NM_003225    | TFF1     | chr21 | + |  |
| NM_003134    | SRP14    | chr15 | + |  |
| NM_003060    | SLC22A5  | chr5  | + |  |
| NM_002957    | RXRA     | chr9  | + |  |
| NM_002911    | UPF1     | chr19 | + |  |
| NM_002841    | PTPRG    | chr3  | + |  |
| NM_002665    | PLGLB2   | chr2  | + |  |
| NM_002583    | PAWR     | chr12 | + |  |
| NM_002449    | MSX2     | chr5  | + |  |
| NM_002430    | MN1      | chr22 | + |  |
| NM_002413    | MGST2    | chr4  | + |  |
| NM_002412    | MGMT     | chr10 | + |  |
| NM_002273    | KRT8     | chr12 | + |  |
| NM_002213    | ITGB5    | chr3  | + |  |
| NM_002154    | HSPA4    | chr5  | + |  |
| NM_002111    | HTT      | chr4  | + |  |
| NM_002074    | GNB1     | chr1  | + |  |
| NM_002052    | GATA4    | chr8  | + |  |
| NM_002019    | FLT1     | chr13 | + |  |
| NM_002014    | FKBP4    | chr12 | + |  |
| NM_001795    | CDH5     | chr16 | + |  |
| NM_001769    | CD9      | chr12 | + |  |
| NM_001756    | SERPINA6 | chr14 | + |  |
| NM_001706    | BCL6     | chr3  | + |  |
| NM_001632    | ALPP     | chr2  | + |  |
| NM_001584    | MPPED2   | chr11 | + |  |
| NM_001552    | IGFBP4   | chr17 | + |  |
| NM_001497    | B4GALT1  | chr9  | + |  |
| NM_001408    | CELSR2   | chr1  | + |  |
| NM_001329    | CTBP2    | chr10 | + |  |
| NM_001310    | CREBL2   | chr12 | + |  |
| NM_001218    | CA12     | chr15 | + |  |
| NM_001166294 | SSX2IP   | chr1  | + |  |
| NM_001166263 | MTIF3    | chr13 | + |  |
| NM_001166108 | PALLD    | chr4  | + |  |
| NM_001164595 | PDZRN4   | chr12 | + |  |
| NM_001164317 | FLNB     | chr3  | + |  |

|              |           |       |   |  |
|--------------|-----------|-------|---|--|
| NM_001163260 | FAM63A    | chr1  | + |  |
| NM_001161841 | SULF2     | chr20 | + |  |
| NM_001161661 | WWC1      | chr5  | + |  |
| NM_001159770 | SLC39A11  | chr17 | + |  |
| NM_001159694 | EMCN      | chr4  | + |  |
| NM_001145443 | PFKFB3    | chr10 | + |  |
| NM_001144758 | PHLDB1    | chr11 | + |  |
| NM_001143989 | NBPF4     | chr1  | + |  |
| NM_001143962 | CAPN8     | chr1  | + |  |
| NM_001143819 | TPCN1     | chr12 | + |  |
| NM_001142272 | RAB11FIP3 | chr16 | + |  |
| NM_001134473 | KIAA0182  | chr16 | + |  |
| NM_001134368 | SLC6A6    | chr3  | + |  |
| NM_001130958 | FABP6     | chr5  | + |  |
| NM_001127714 | HIVEP3    | chr1  | + |  |
| NM_001122742 | ESR1      | chr6  | + |  |
| NM_001122606 | LAMP2     | chrX  | + |  |
| NM_001116    | ADCY9     | chr16 | + |  |
| NM_001113239 | HIPK2     | chr7  | + |  |
| NM_001105568 | KIF13A    | chr6  | + |  |
| NM_001105192 | TLE3      | chr15 | + |  |
| NM_001100913 | PACS2     | chr14 | + |  |
| NM_001100590 | KIAA0232  | chr4  | + |  |
| NM_001081562 | DMPK      | chr19 | + |  |
| NM_001080479 | RGNEF     | chr5  | + |  |
| NM_001080414 | CCDC88C   | chr14 | + |  |
| NM_001079539 | XBP1      | chr22 | + |  |
| NM_001077484 | SLC38A1   | chr12 | + |  |
| NM_001077397 | IRF2BP2   | chr1  | + |  |
| NM_001042665 | PLEKHG5   | chr1  | + |  |
| NM_001042353 | FAM110A   | chr20 | + |  |
| NM_001039360 | ZBTB7C    | chr18 | + |  |
| NM_001035223 | RGL3      | chr19 | + |  |
| NM_001034850 | FAM134B   | chr5  | + |  |
| NM_001033057 | MAGI1     | chr3  | + |  |
| NM_001032391 | LCMT1     | chr16 | + |  |
| NM_001029851 | PDE8B     | chr5  | + |  |
| NM_001024956 | SC5DL     | chr11 | + |  |
| NM_001024074 | HNMT      | chr2  | + |  |
| NM_001018074 | NR3C1     | chr5  | + |  |
| NM_001014797 | KCNMA1    | chr10 | + |  |
| NM_001006657 | WDR35     | chr2  | + |  |
| NM_001005914 | SEMA3B    | chr3  | + |  |

|              |         |       |   |  |
|--------------|---------|-------|---|--|
| NM_001005476 | PKP4    | chr2  | + |  |
| NM_001005159 | SFMBT1  | chr3  | + |  |
| NM_001003698 | RREB1   | chr6  | + |  |
| NM_001002914 | KCTD11  | chr17 | + |  |
| NM_001002295 | GATA3   | chr10 | + |  |
| NM_001001664 | SPOPL   | chr2  | + |  |
| NM_000926    | PGR     | chr11 | + |  |
| NM_000720    | CACNA1D | chr3  | + |  |
| NM_000633    | BCL2    | chr18 | + |  |
| NM_000623    | BDKRB2  | chr14 | + |  |
| NM_000618    | IGF1    | chr12 | + |  |
| NM_000609    | CXCL12  | chr10 | + |  |
| NM_000552    | VWF     | chr12 | + |  |
| NM_000501    | ELN     | chr7  | + |  |
| NM_000366    | TPM1    | chr15 | + |  |
| NM_000283    | PDE6B   | chr4  | + |  |
| NM_000224    | KRT18   | chr12 | + |  |
| NM_000153    | GALC    | chr14 | + |  |

## Additional file 2 –Candidate SNPs

|                                                                                                                                                                                                                                                                                                                                                                                                                                                                                                                                                                                                                                                                                                                                                                                                                                                                                                                                                                                                                                                                                                                                                                                                                                                                                                                                                                                                                                                                                                                                                                                                                                                                                                                                                                                                                                                                                                                                                                                                                                                                                                                                                                                                                                                                                                                                                                                                                                                                                                                                                                                                                                                                                                                                                                                                                                                                                                                                                                                                                                                                                                                                                                                                                                                                                                                                                                                                                                                                                                                                                                                                                                                                                                                                                                                                                                                                                                                               |
|-------------------------------------------------------------------------------------------------------------------------------------------------------------------------------------------------------------------------------------------------------------------------------------------------------------------------------------------------------------------------------------------------------------------------------------------------------------------------------------------------------------------------------------------------------------------------------------------------------------------------------------------------------------------------------------------------------------------------------------------------------------------------------------------------------------------------------------------------------------------------------------------------------------------------------------------------------------------------------------------------------------------------------------------------------------------------------------------------------------------------------------------------------------------------------------------------------------------------------------------------------------------------------------------------------------------------------------------------------------------------------------------------------------------------------------------------------------------------------------------------------------------------------------------------------------------------------------------------------------------------------------------------------------------------------------------------------------------------------------------------------------------------------------------------------------------------------------------------------------------------------------------------------------------------------------------------------------------------------------------------------------------------------------------------------------------------------------------------------------------------------------------------------------------------------------------------------------------------------------------------------------------------------------------------------------------------------------------------------------------------------------------------------------------------------------------------------------------------------------------------------------------------------------------------------------------------------------------------------------------------------------------------------------------------------------------------------------------------------------------------------------------------------------------------------------------------------------------------------------------------------------------------------------------------------------------------------------------------------------------------------------------------------------------------------------------------------------------------------------------------------------------------------------------------------------------------------------------------------------------------------------------------------------------------------------------------------------------------------------------------------------------------------------------------------------------------------------------------------------------------------------------------------------------------------------------------------------------------------------------------------------------------------------------------------------------------------------------------------------------------------------------------------------------------------------------------------------------------------------------------------------------------------------------------------|
| <b>Chromosome 1</b>                                                                                                                                                                                                                                                                                                                                                                                                                                                                                                                                                                                                                                                                                                                                                                                                                                                                                                                                                                                                                                                                                                                                                                                                                                                                                                                                                                                                                                                                                                                                                                                                                                                                                                                                                                                                                                                                                                                                                                                                                                                                                                                                                                                                                                                                                                                                                                                                                                                                                                                                                                                                                                                                                                                                                                                                                                                                                                                                                                                                                                                                                                                                                                                                                                                                                                                                                                                                                                                                                                                                                                                                                                                                                                                                                                                                                                                                                                           |
| ANXA9:rs78982670,rs607518,rs3754210                                                                                                                                                                                                                                                                                                                                                                                                                                                                                                                                                                                                                                                                                                                                                                                                                                                                                                                                                                                                                                                                                                                                                                                                                                                                                                                                                                                                                                                                                                                                                                                                                                                                                                                                                                                                                                                                                                                                                                                                                                                                                                                                                                                                                                                                                                                                                                                                                                                                                                                                                                                                                                                                                                                                                                                                                                                                                                                                                                                                                                                                                                                                                                                                                                                                                                                                                                                                                                                                                                                                                                                                                                                                                                                                                                                                                                                                                           |
| CAMTA1:rs11120798,rs80085554,rs78547373,rs35190009,rs1013248,rs61780894,rs12410166,rs1567402,rs68129642,rs74813748,rs72638577                                                                                                                                                                                                                                                                                                                                                                                                                                                                                                                                                                                                                                                                                                                                                                                                                                                                                                                                                                                                                                                                                                                                                                                                                                                                                                                                                                                                                                                                                                                                                                                                                                                                                                                                                                                                                                                                                                                                                                                                                                                                                                                                                                                                                                                                                                                                                                                                                                                                                                                                                                                                                                                                                                                                                                                                                                                                                                                                                                                                                                                                                                                                                                                                                                                                                                                                                                                                                                                                                                                                                                                                                                                                                                                                                                                                 |
| CAPN8:rs68072917,rs4653877                                                                                                                                                                                                                                                                                                                                                                                                                                                                                                                                                                                                                                                                                                                                                                                                                                                                                                                                                                                                                                                                                                                                                                                                                                                                                                                                                                                                                                                                                                                                                                                                                                                                                                                                                                                                                                                                                                                                                                                                                                                                                                                                                                                                                                                                                                                                                                                                                                                                                                                                                                                                                                                                                                                                                                                                                                                                                                                                                                                                                                                                                                                                                                                                                                                                                                                                                                                                                                                                                                                                                                                                                                                                                                                                                                                                                                                                                                    |
| CR1:rs55813295,rs55813295,rs55905875,rs55905875,rs55875400,rs55875400,rs56079743,rs55722040,rs56109143,rs56109143,rs56182593,rs56030162,rs56030162,rs56114117,rs56114117,rs56275712,rs55974817,rs55991702,rs55991702,rs55777427,rs55777427,rs56084806,rs56084806,rs55754610,rs56298042,rs56298042,rs56411060,rs55785804,rs55785804,rs55779204,rs55779204,rs56302981,rs56302981,rs55828967,rs55828967,rs56193300,rs56193300,rs56204135,rs56204135,rs56276874,rs56276874,rs55811516,rs56093932,rs56093932,rs56168197,rs56168197,rs56002956,rs56002956,rs55865820,rs55703877,rs55703877,rs55983342,rs55983342,rs55771013,rs555641872,rs55767627,rs55767627,rs56047029,rs56047029,rs56102197,rs56391032,rs56391032,rs55915510,rs55666812,rs55666812,rs55885741,rs55718069,rs55718069,rs55729318,rs55729318,rs56030390,rs56030390,rs55726190,rs55726190,rs55801279,rs55801279,rs56092428,rs56092428,rs55929821,rs56015412,rs56015412,rs1967828,rs56359850,rs56359850,rs55669141,rs55669141,rs55761008,rs55761008,rs5618781,rs5618781,rs55670331,rs55670331,rs56361204,rs56267956,rs55991765,rs55786257,rs55786257,rs55639135,rs55639135,rs55883797,rs56373231,rs56398864,rs56398864,rs55704769,rs56353950,rs56043167,rs56261321,rs56261321,rs55979404,rs56314797,rs56314797,rs55653509,rs56052213,rs56313533,rs56009212,rs56009212,rs55848422,rs56310405,rs56352571,rs56352571,rs56015758,rs56015758,rs56072537,rs56072537,rs56234734,rs55878655,rs55878655,rs56326394,rs56326394,rs55791318,rs55791318,rs55724640,rs55724640,rs55997834,rs55997834,rs56378827,rs56378827,rs55938003,rs55959625,rs56307287,rs56307287,rs55830750,rs55830750,rs55846619,rs55846619,rs55912924,rs55912924,rs55846728,rs56171829,rs56353976,rs56353976,rs55918401,rs55918401,rs55815626,rs55815626,rs56043430,rs56043430,rs56129138,rs56129138,rs55836426,rs55749808,rs55749808,rs55811653,rs55811653,rs56345001,rs55970375,rs55970375,rs55979222,rs55979222,rs55900657,rs55900657,rs55753551,rs55753551,rs56177984,rs56392313,rs56392313,rs55952684,rs56205102,rs55720721,rs55720721,rs55846136,rs55846136,rs56409218,rs56409218,rs55767030,rs55658501,rs56195127,rs56265707,rs56265707,rs55884405,rs55884405,rs55735142,rs56037822,rs56037822,rs56019948,rs56053139,rs55956260,rs55956260,rs55902061,rs55902061,rs55643045,rs55643045,rs56311501,rs56300774,rs56156766,rs55978552,rs55978552,rs55864105,rs55864105,rs55745723,rs55745723,rs55803443,rs55803443,rs55924525,rs56139167,rs56139167,rs55717512,rs55717512,rs56052895,rs56020776,rs56020776,rs5593005,rs55878543,rs55975235,rs55974321,rs55846628,rs55846628,rs56299420,rs56346880,rs56346880,rs55978988,rs55978988,rs56203358,rs56203358,rs56013449,rs56013449,rs55896092,rs56005541,rs56005541,rs55677167,rs55677167,rs56343686,rs56343686,rs55767641,rs55767641,rs55937128,rs55937128,rs55762770,rs55762770,rs56129265,rs56129265,rs55642106,rs55642106,rs55641633,rs56077723,rs56077723,rs56187018,rs56187018,rs56135198,rs56135198,rs56275361,rs56275361,rs56079149,rs56079149,rs56283013,rs56116155,rs56293185,rs56293185,rs56344090,rs56344090,rs56190053,rs56190053,rs56254726,rs56254726,rs55660220,rs55660220,rs56292493,rs56292493,rs55920254,rs55920254,rs56137601,rs56137601,rs55878564,rs55878564,rs55958312,rs56351037,rs56351037,rs56355024,rs56355024,rs55693072,rs56018236,rs55749945,rs56246301,rs56246301,rs55906506,rs55906506,rs55722809,rs55722809,rs55639201,rs55736256,rs56399315,rs56399315,rs55788979,rs55788979,rs55795011,rs56246645,rs56246645,rs55992341,rs55645336,rs55653580,rs56326826,rs55823564,rs55823564,rs55812785,rs55812785,rs56002218,rs55960704,rs55960704,rs56067147,rs56067147,rs56352598,rs56352598,rs55675707,rs55836902,rs55945035,rs55945035,rs55964020,rs56056140,rs55869469,rs55869469,rs56244656,rs56244656,rs55801565,rs56187514,rs55976152,rs55976152,rs56013080,rs56231283,rs56018255,rs55789578,rs55789578,rs55671111,rs55671111 |
| CSRP1:rs34038448,rs80336819,rs12070807,rs515384                                                                                                                                                                                                                                                                                                                                                                                                                                                                                                                                                                                                                                                                                                                                                                                                                                                                                                                                                                                                                                                                                                                                                                                                                                                                                                                                                                                                                                                                                                                                                                                                                                                                                                                                                                                                                                                                                                                                                                                                                                                                                                                                                                                                                                                                                                                                                                                                                                                                                                                                                                                                                                                                                                                                                                                                                                                                                                                                                                                                                                                                                                                                                                                                                                                                                                                                                                                                                                                                                                                                                                                                                                                                                                                                                                                                                                                                               |
| GCLM:rs2273406,rs2273407,rs34743713                                                                                                                                                                                                                                                                                                                                                                                                                                                                                                                                                                                                                                                                                                                                                                                                                                                                                                                                                                                                                                                                                                                                                                                                                                                                                                                                                                                                                                                                                                                                                                                                                                                                                                                                                                                                                                                                                                                                                                                                                                                                                                                                                                                                                                                                                                                                                                                                                                                                                                                                                                                                                                                                                                                                                                                                                                                                                                                                                                                                                                                                                                                                                                                                                                                                                                                                                                                                                                                                                                                                                                                                                                                                                                                                                                                                                                                                                           |
| HIVEP3:rs12135701,rs655198,rs78804462                                                                                                                                                                                                                                                                                                                                                                                                                                                                                                                                                                                                                                                                                                                                                                                                                                                                                                                                                                                                                                                                                                                                                                                                                                                                                                                                                                                                                                                                                                                                                                                                                                                                                                                                                                                                                                                                                                                                                                                                                                                                                                                                                                                                                                                                                                                                                                                                                                                                                                                                                                                                                                                                                                                                                                                                                                                                                                                                                                                                                                                                                                                                                                                                                                                                                                                                                                                                                                                                                                                                                                                                                                                                                                                                                                                                                                                                                         |
| NOTCH2NL:rs61815730,rs453773,rs2725962,rs2596007,rs384086,rs1690058,rs447289                                                                                                                                                                                                                                                                                                                                                                                                                                                                                                                                                                                                                                                                                                                                                                                                                                                                                                                                                                                                                                                                                                                                                                                                                                                                                                                                                                                                                                                                                                                                                                                                                                                                                                                                                                                                                                                                                                                                                                                                                                                                                                                                                                                                                                                                                                                                                                                                                                                                                                                                                                                                                                                                                                                                                                                                                                                                                                                                                                                                                                                                                                                                                                                                                                                                                                                                                                                                                                                                                                                                                                                                                                                                                                                                                                                                                                                  |
| UBE2T:rs34701328,rs55668607,rs14451,rs56283140,rs79811259                                                                                                                                                                                                                                                                                                                                                                                                                                                                                                                                                                                                                                                                                                                                                                                                                                                                                                                                                                                                                                                                                                                                                                                                                                                                                                                                                                                                                                                                                                                                                                                                                                                                                                                                                                                                                                                                                                                                                                                                                                                                                                                                                                                                                                                                                                                                                                                                                                                                                                                                                                                                                                                                                                                                                                                                                                                                                                                                                                                                                                                                                                                                                                                                                                                                                                                                                                                                                                                                                                                                                                                                                                                                                                                                                                                                                                                                     |
| <b>Chromosome 2</b>                                                                                                                                                                                                                                                                                                                                                                                                                                                                                                                                                                                                                                                                                                                                                                                                                                                                                                                                                                                                                                                                                                                                                                                                                                                                                                                                                                                                                                                                                                                                                                                                                                                                                                                                                                                                                                                                                                                                                                                                                                                                                                                                                                                                                                                                                                                                                                                                                                                                                                                                                                                                                                                                                                                                                                                                                                                                                                                                                                                                                                                                                                                                                                                                                                                                                                                                                                                                                                                                                                                                                                                                                                                                                                                                                                                                                                                                                                           |

|                                                                                                                                          |
|------------------------------------------------------------------------------------------------------------------------------------------|
| HK2:rs28362965                                                                                                                           |
| LONRF2:rs79560895,rs7575849,rs17023907,rs77359732,rs11902303                                                                             |
| LYPD6B:rs79776678,rs7605478,rs6709479                                                                                                    |
| PKP4:rs1110506                                                                                                                           |
| SCTR:rs6542532                                                                                                                           |
| TP53I3:rs36207095,rs36207096,rs72049316,rs35924313,rs36207097,rs3030953,rs34502732,rs34704159,rs72078174,rs72135009,rs34362184,rs5829915 |
| TTC7A:rs79353883,rs12105384                                                                                                              |
| WDR35:rs75004252,rs36061489                                                                                                              |
| <b>Chromosome 3</b>                                                                                                                      |
| ADAMTS9:rs73832347,rs35802352,rs77195672                                                                                                 |
| ADCY5:rs79462429                                                                                                                         |
| CACNA1D:rs79016258,rs78461250,rs75140300,rs77921094,rs17053128,rs76823338,rs75094150,rs72967859,rs78207451,rs11336778                    |
| FLNB:rs34911064,rs4453809,rs1718481,rs3772997,rs13067161                                                                                 |
| LPP:rs35902973,rs75330435,rs7653763,rs80236973,rs77602825,rs7646788                                                                      |
| MAGI1:rs76005698                                                                                                                         |
| MYLK:rs7653257,rs7641367,rs820455                                                                                                        |
| OSBPL10:rs35962535,rs79883182                                                                                                            |
| PDCD6IP:rs75015608,rs71875147,rs28381975                                                                                                 |
| PTPRG:rs28403395,rs588087,rs75480068,rs35061772,rs58646519,rs76704401,rs78836651                                                         |
| PXK:rs6775710,rs73835192                                                                                                                 |
| SEMA3B:rs12492880                                                                                                                        |
| SFMBT1:rs78698666                                                                                                                        |
| SGEF:rs74956401                                                                                                                          |
| SLC6A6:rs78003737                                                                                                                        |
| SUCLG2:rs74816918,rs75756678,rs79702177                                                                                                  |
| <b>Chromosome 4</b>                                                                                                                      |
| ARHGAP10:rs11724772,rs7698520                                                                                                            |
| HTT:rs71597206,rs16843836                                                                                                                |
| LETM1:rs73202820                                                                                                                         |
| PALLD:rs76731571,rs2712149,rs2712148,rs2712147                                                                                           |
| SHROOM3:rs77486910,rs73828194                                                                                                            |
| TBC1D9:rs57949768,rs74858974,rs71606900,rs7686941                                                                                        |
| TIFA:rs78320467,rs12510546                                                                                                               |
| TSPAN5:rs75532697,rs62323584,rs7665200                                                                                                   |
| <b>Chromosome 5</b>                                                                                                                      |
| ABLIM3:rs74471144                                                                                                                        |
| FBXO38:rs76818493                                                                                                                        |
| ISOC1:rs17163708                                                                                                                         |
| N4BP3:rs34062956,rs6601214,rs34226224,rs66991293,rs10635660                                                                              |
| PDE4D:rs72530555,rs6450518,rs2702365,rs10616440                                                                                          |
| RGNEF:rs6881956,rs56692172,rs75553400,rs76642132,rs78248942                                                                              |
| SLC22A5:rs274567,rs77123396                                                                                                              |

|                                                                     |
|---------------------------------------------------------------------|
| WWC1:rs76463523,rs75849226                                          |
| ZNF346:rs2456181                                                    |
| <b>Chromosome 6</b>                                                 |
| CNKSR3:rs4870286,rs4870285,rs9478547,rs56359828,rs74679650          |
| DOPEY1:rs74920300,rs78582064                                        |
| MYB:rs17064301,rs11321182                                           |
| RREB1:rs9392864,rs35178637                                          |
| SYNJ2:rs78693252                                                    |
| TAF8:rs2493838,rs9394860,rs76562503,rs35711896                      |
| TPD52L1:rs17052846,rs55736347,rs76997203,rs3799757                  |
| <b>Chromosome 7</b>                                                 |
| ARPC1B:rs59680363                                                   |
| C7orf41:rs28701848,rs28364759,rs17547923,rs3750090                  |
| GCK:rs2908296,rs2908297                                             |
| HIPK2:rs58760678,rs940543,rs77111783                                |
| RALA:rs35116603,rs71700028,rs74655958,rs72460287,rs70996821         |
| SEMA3C:rs767733,rs35240493,rs58168478                               |
| <b>Chromosome 8</b>                                                 |
| ASAP1:rs17287702,rs73425525,rs77467207                              |
| DLGAP2:rs4875876,rs34951699,rs4875877,rs4875878                     |
| GATA4:rs10096189,rs17153694,rs10109678,rs78693845                   |
| NBN:rs13312849,rs1805844,rs72085652,rs76432414,rs1805799,rs71862785 |
| NDRG1:rs71526285,rs61543350,rs73708719,rs75523276,rs13263811        |
| PABPC1:rs73700221,rs56400641                                        |
| <b>Chromosome 9</b>                                                 |
| RASEF:rs77598922,rs76617114                                         |
| RXRA:rs62576308,rs12006409,rs79703336                               |
| SH3GLB2:rs5900824                                                   |
| UGCG:rs78807957                                                     |
| <b>Chromosome 10</b>                                                |
| BAG3:rs12358294,rs196317,rs7894233,rs7909225,rs196316               |
| CAMK1D:rs2768444,rs2768443                                          |
| CTBP2:rs35602222,rs10510141,rs7080602                               |
| H2AFY2:rs56317707,rs35898392                                        |
| PFKFB3:rs10905916,rs60080851,rs76884437,rs10795848                  |
| SEC61A2:rs9329337                                                   |
| <b>Chromosome 11</b>                                                |
| ANO1:rs61885477                                                     |
| ARRB1:rs2507924,rs34867163                                          |
| DHCR7:rs77926919,rs11233713                                         |
| MARK2:rs76906610,rs928948,rs75857867                                |
| MPPED2:rs1222322,rs75642617,rs4922836                               |
| PHLDB1:rs75727057,rs5795129,rs67407552,rs35307519,rs33922258        |

|                                                                                                 |
|-------------------------------------------------------------------------------------------------|
| PLEKHA7:rs4141194,rs76831006                                                                    |
| RAB30:rs76931067,rs17144486,rs4944422                                                           |
| SPON1:rs1528668,rs1528669,rs73420271                                                            |
| STARD10:rs79843144                                                                              |
| TCIRG1:rs4147783                                                                                |
| <b>Chromosome 12</b>                                                                            |
| CD9:rs17850834,rs11568275,rs11568274                                                            |
| CHPT1:rs59147798,rs74692062                                                                     |
| DENND5B:rs34417003,rs62663961                                                                   |
| ETV6:rs16907207,rs77355907,rs2710267,rs12816113                                                 |
| GAPDH:rs36015908,rs45612631,rs45459592,rs45564644                                               |
| HSPB8:rs74648395                                                                                |
| PITPNM2:rs71456785,rs61955220                                                                   |
| SLC38A1:rs74831463,rs10880935,rs77006492,rs11183394                                             |
| TPCN1:rs74907360                                                                                |
| TUBA1A:rs58704368                                                                               |
| VWF:rs78016141,rs2283332,rs1800375,rs1800376                                                    |
| <b>Chromosome 13</b>                                                                            |
| FLT1:rs79452797,rs78305106,rs75363896                                                           |
| MCF2L:rs60864968,rs9549623,rs9549622                                                            |
| <b>Chromosome 14</b>                                                                            |
| ACTN1:rs28657981,rs11626371,rs28514277,rs79000248,rs75442387,rs2268982                          |
| BDKRB2:rs56274409,rs61193624                                                                    |
| C14orf43:rs79553653,rs76405516,rs28605040                                                       |
| CCDC88C:rs60137749,rs61988430                                                                   |
| FBXO34:rs943591,rs943590,rs943592                                                               |
| PACS2:rs78224797,rs79894079                                                                     |
| RAD51L1:rs7160794,rs76498298,rs79877406,rs73288074,rs76764799,rs35055159,rs1958112              |
| SERPINA6:rs1998057,rs2281518,rs73346825                                                         |
| <b>Chromosome 15</b>                                                                            |
| ABHD2:rs75057621,rs75080156,rs4566139,rs35226145                                                |
| <b>Chromosome 16</b>                                                                            |
| CBFA2T3:rs75269947,rs16965183,rs72140231,rs35191022,rs76188937,rs62045796,rs72815515,rs12445380 |
| CHD9:rs35319530                                                                                 |
| FAM100A:rs1982784,rs76081350,rs78906334                                                         |
| KIAA0513:rs35349567,rs4991777,rs870149,rs870148,rs35649977                                      |
| LCMT1:rs34551656,rs71385512                                                                     |
| RAB11FIP3:rs74724425                                                                            |
| RAB40C:rs62030903,rs62030902                                                                    |
| ZFHX3:rs59660358,rs721823,rs74028152,rs35577902                                                 |
| <b>Chromosome 17</b>                                                                            |
| ACE:rs13306085,rs4308,rs4309,rs72845022,rs59148455                                              |
| AKAP1:rs74776597                                                                                |



|                                                                                                                           |
|---------------------------------------------------------------------------------------------------------------------------|
| IGFBP4:rs10305291                                                                                                         |
| MAP3K14:rs77617592                                                                                                        |
| MSI2:rs7214435,rs71365819,rs57563427,rs35327867,rs68081130,rs35611813,rs76341695,rs71387499,rs76089718                    |
| PITPNCL:rs8068510,rs1808693,rs7207677,rs79516805                                                                          |
| PLCD3:rs10468559,rs7214439,rs7224944,rs73316962,rs77506254                                                                |
| SLC25A19:rs80337330,rs56090937                                                                                            |
| TBC1D16:rs67455669,rs59043351                                                                                             |
| <b>Chromosome 18</b>                                                                                                      |
| ANKRD29:rs76162671,rs34580471,rs35841435,rs76695608                                                                       |
| BCL2:rs3744949                                                                                                            |
| C18orf1:rs74482571,rs73421368                                                                                             |
| EMILIN2:rs11660827,rs72870058                                                                                             |
| IMPA2:rs75061481,rs76907436                                                                                               |
| KLHL14:rs61737324,rs61737323                                                                                              |
| RAB31:rs8091795,rs78258961                                                                                                |
| SETBP1:rs79136715,rs16978187,rs9954058                                                                                    |
| <b>Chromosome 19</b>                                                                                                      |
| ACTN4:rs973009,rs973010                                                                                                   |
| CHST8:rs284327,rs1400615                                                                                                  |
| DMPK:rs35500073,rs75890421                                                                                                |
| PTPRH:rs78703538,rs76990668                                                                                               |
| RGL3:rs34081                                                                                                              |
| UPF1:rs9917075,rs34322276,rs73923167,rs80073951                                                                           |
| ZC3H4:rs75022794,rs3745619,rs370649,rs442311,rs402833                                                                     |
| <b>Chromosome 20</b>                                                                                                      |
| PREX1:rs73326946,rs76652968,rs3746818,rs6095263,rs6063325,rs6019348,rs77571056,rs73911613,rs58812371                      |
| RPRD1B:rs79813465,rs6013782                                                                                               |
| SLC24A3:rs61185867,rs6106055,rs16980301,rs72073549,rs73282685                                                             |
| <b>Chromosome 21</b>                                                                                                      |
| ICOSLG:rs35622408,rs75939338,rs2847224                                                                                    |
| NRIP1:rs72547880,rs7280064,rs11434871,rs66500136,rs78658187,rs35728511,rs34828787                                         |
| PCBP3:rs2150454,rs55929196,rs78386080,rs75450717,rs63013260,rs7276623,rs76636709,rs2839025,rs34579989,rs72374338          |
| <b>Chromosome 22</b>                                                                                                      |
| CDC42EP1:rs11912966                                                                                                       |
| CELSR1:rs75807774,rs74324720,rs9615971,rs79272284,rs5768827,rs9615969,rs76623479,rs5768828,rs71313051,rs5768750,rs9615970 |
| MGAT3:rs75998268,rs78777985,rs34943118,rs9619814,rs9619815                                                                |
| MN1:rs75880328,rs74362945                                                                                                 |
| MPST:rs5756489                                                                                                            |
| SNAP29:rs1802503,rs5844445,rs165877,rs72465347,rs3202072,rs73879429,rs35888298,rs3041344,rs67020728                       |
| <b>Chromosome X</b>                                                                                                       |
| SH3KBP1:rs35270010                                                                                                        |
